# Supplementary material
Source: PubMed Central journal article supplement (PMC5746473)
Supplement: NIHMS910787-supplement-Graphic_Abstract.pdf [file NIHMS910787-supplement-Graphic_Abstract.pdf]

**Dyslipidemia**

**Pro-atherogenic  
Disturbed Flow**

Descending Aorta  
Laminar Flow

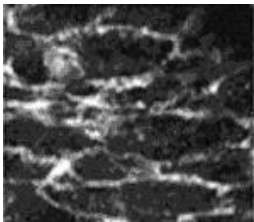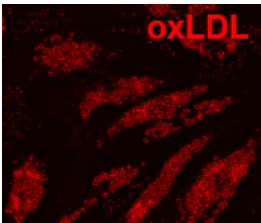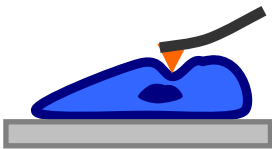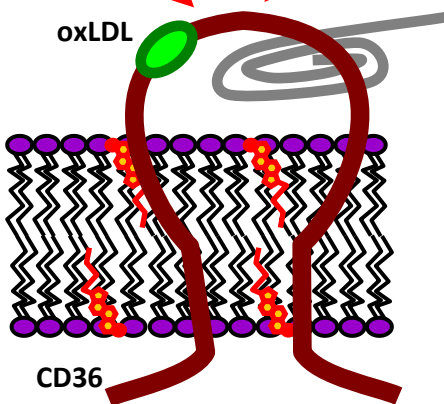

Aortic Arch  
Disturbed Flow

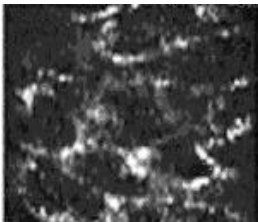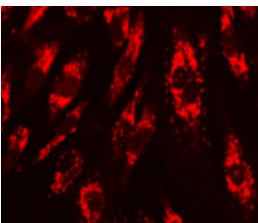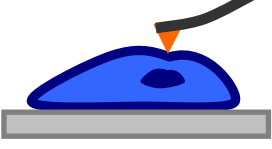

**Endothelial  
Stiffening**
