# Supplementary material
Source: PubMed Central journal article supplement (PMC5746473)
Supplement: NIHMS910787-supplement-Legacy_Supplemental_File.pdf [file NIHMS910787-supplement-Legacy_Supplemental_File.pdf]

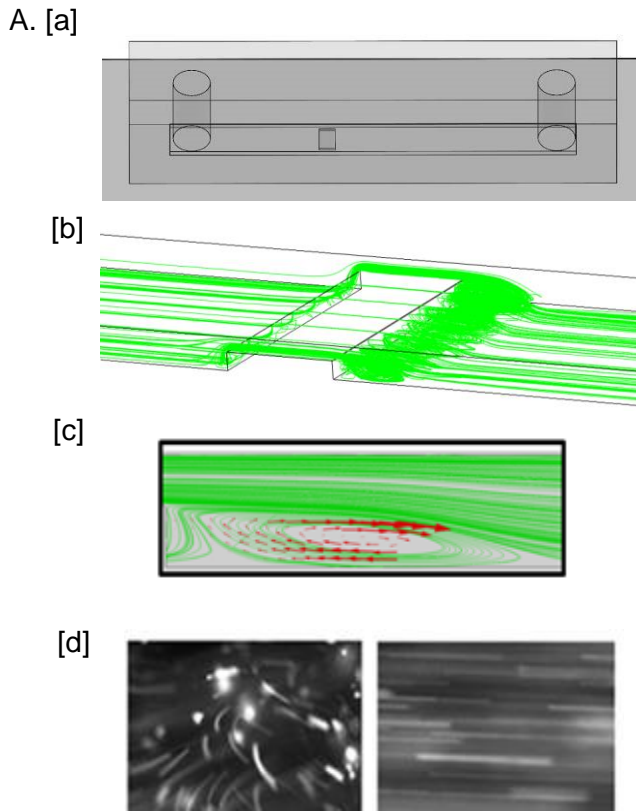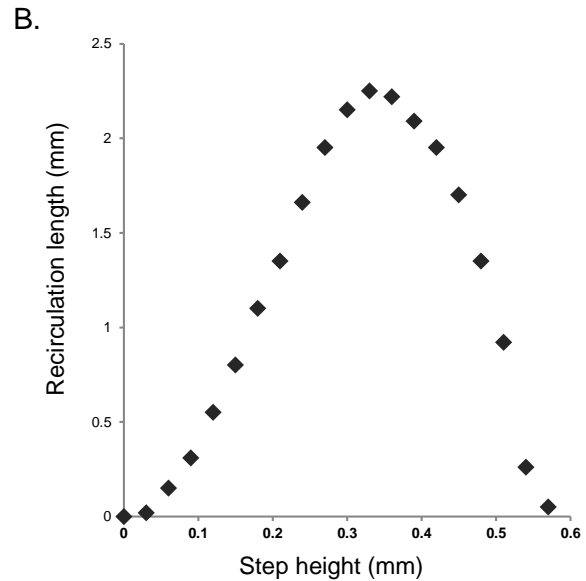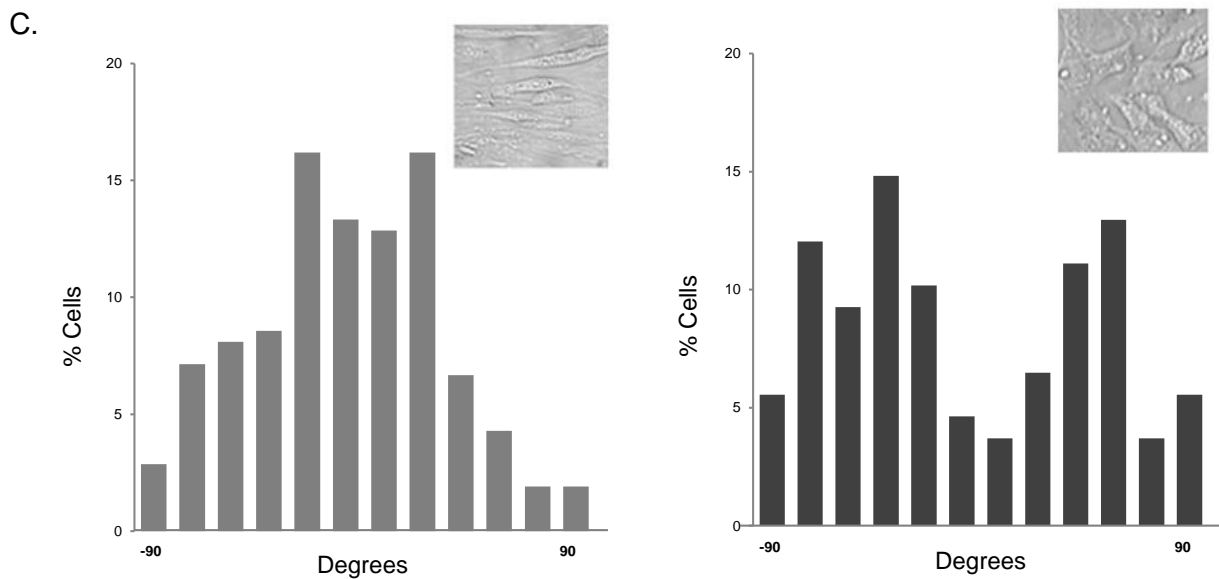

**Supplemental Figure I:** **A:** [a] CAD (computer aided design) image of the final chamber design depicting the step barrier midway in the chamber and fluid inlet/outlet on each side. [b] Computational fluid dynamics (CFD) simulation showing the streamlines of a recirculation region following a step barrier and unidirectional laminar flow before and after the step. [c] Streamlines (green) and velocity vectors (red) depicting the recirculating, disturbed flow patterns after the step barrier. [d] The trajectories of fluorescent microbeads under flow after the step (left) compared to the laminar region. **B:** Recirculation length after the step barrier as a function of varying step height. **C:** Endothelial alignment measurements in HAECs in LF (left) and DF conditions. 20-40 cells per condition, n=3 independent experiments. Inset shows representative images of the characteristic endothelial morphology of HAECs under LF (left) and DF.

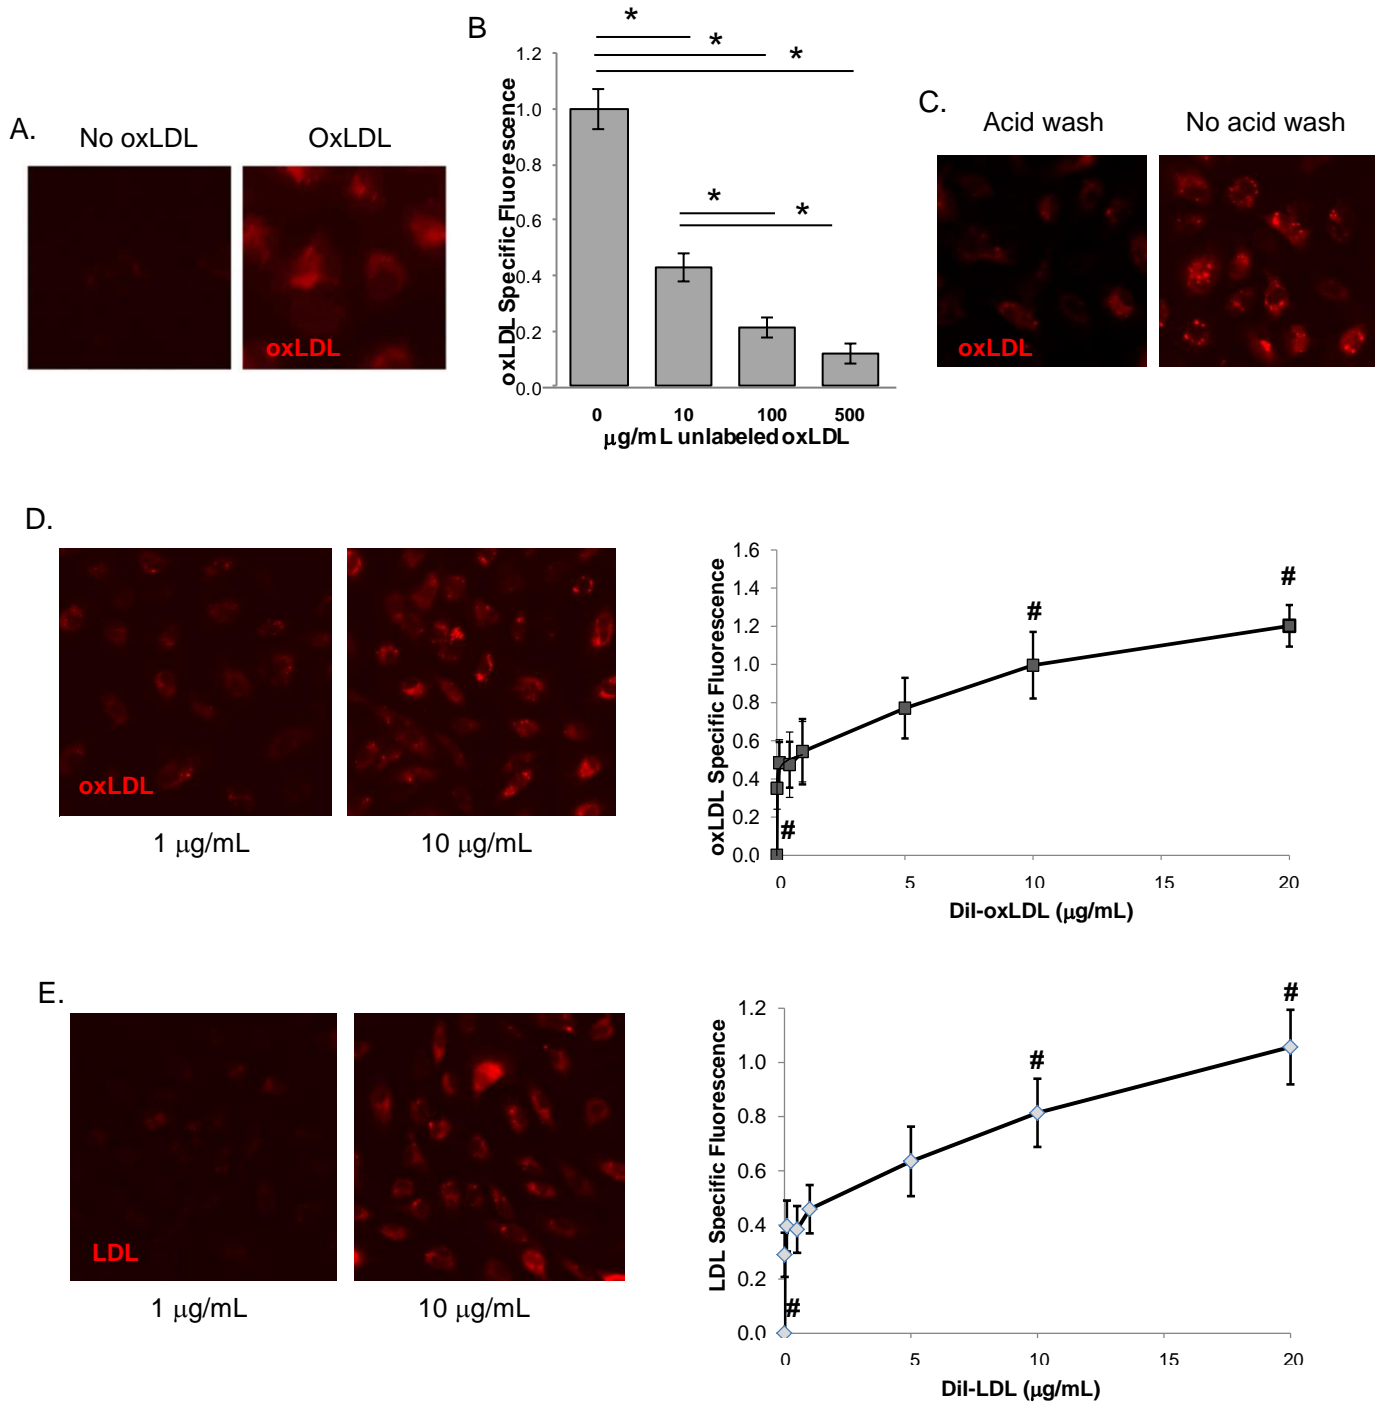

**Supplemental Figure II:** **A:** Representative rhodamine images of cells without Dil-oxLDL (left) and with Dil-oxLDL (right). **B:** OxLDL specific fluorescence as a function of the addition of increasing amounts of unlabeled oxLDL. **C:** Representative images visually show that an acid wash removes the undesired bound Dil-oxLDL particles still attached to the fixed ECs. **D and E:** OxLDL (**D**) and LDL (**E**) specific fluorescent signal as a function of increasing amounts of Dil-oxLDL and Dil-LDL, respectively. Representative images are shown on the left. \*  $p < 0.05$ ; #  $p < 0.05$  with 1000 ng/mL Dil-oxLDL and Dil-LDL, respectively.

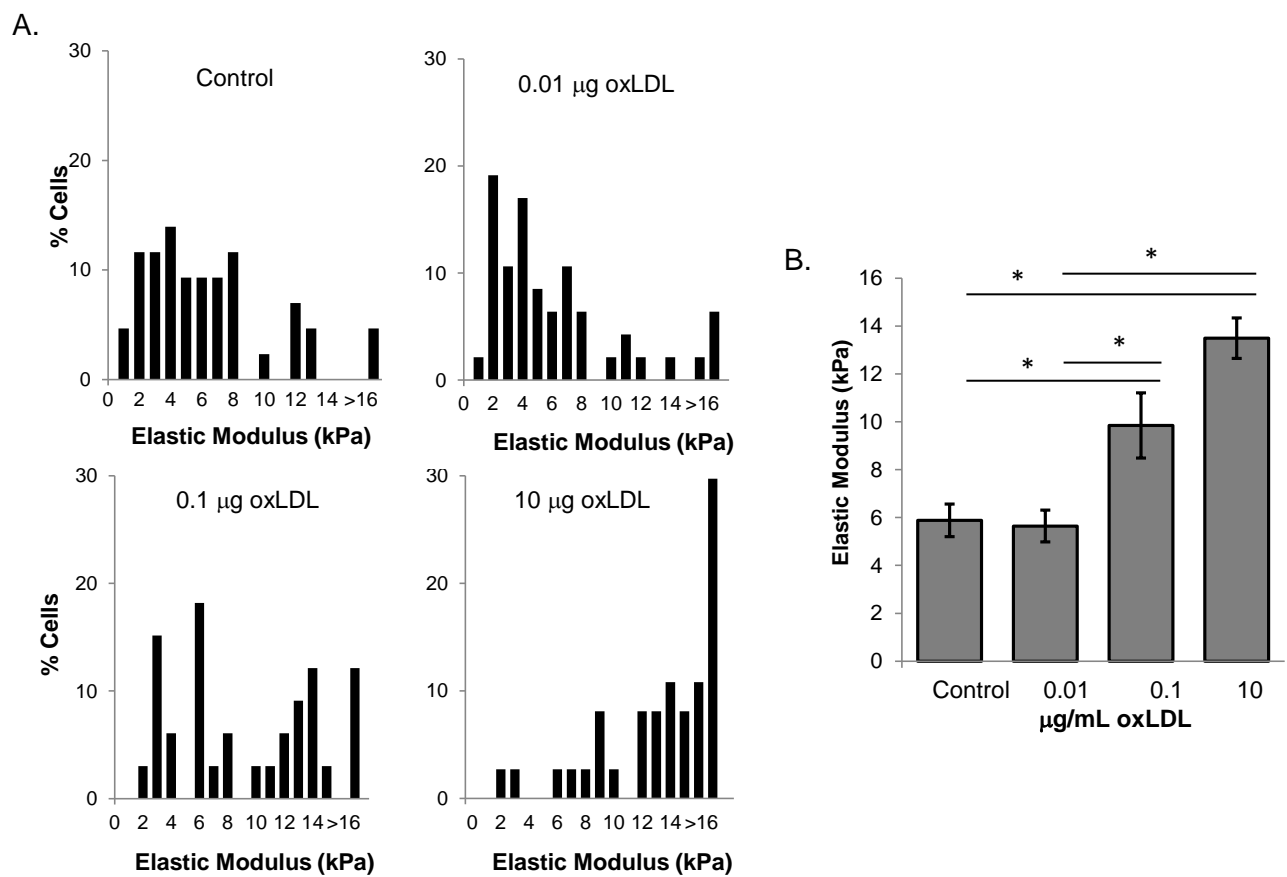

**Supplemental Figure III: A:** Histograms showing the elastic modulus values of HAECs exposed to varying concentrations of oxLDL for 48 hours. **B:** Average elastic modulus of HAECs treated with 0, 0.01, 0.1 or 10 μg/mL oxLDL. \* p<0.05

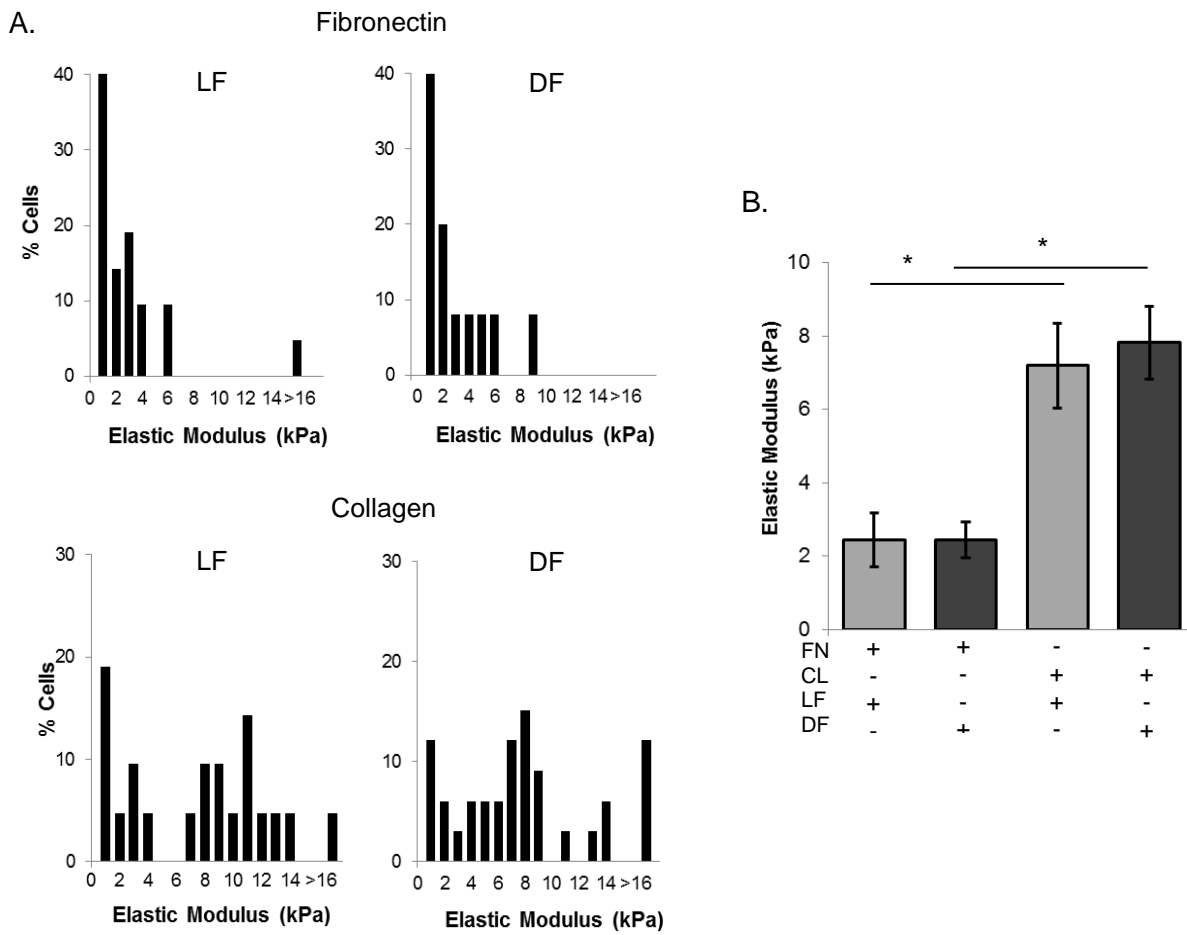

**Supplemental Figure IV:** **A:** Histograms depicting the elastic modulus of HAECs grown on fibronectin- (FN, top) and collagen-coated (CL, bottom) PDMS microfluidic devices following 48 hours of LF (left) and DF (right) (20-30 cells per condition, 4 independent experiments). **B:** Average elastic modulus of ECs from the above described conditions. \*  $p < 0.05$ .

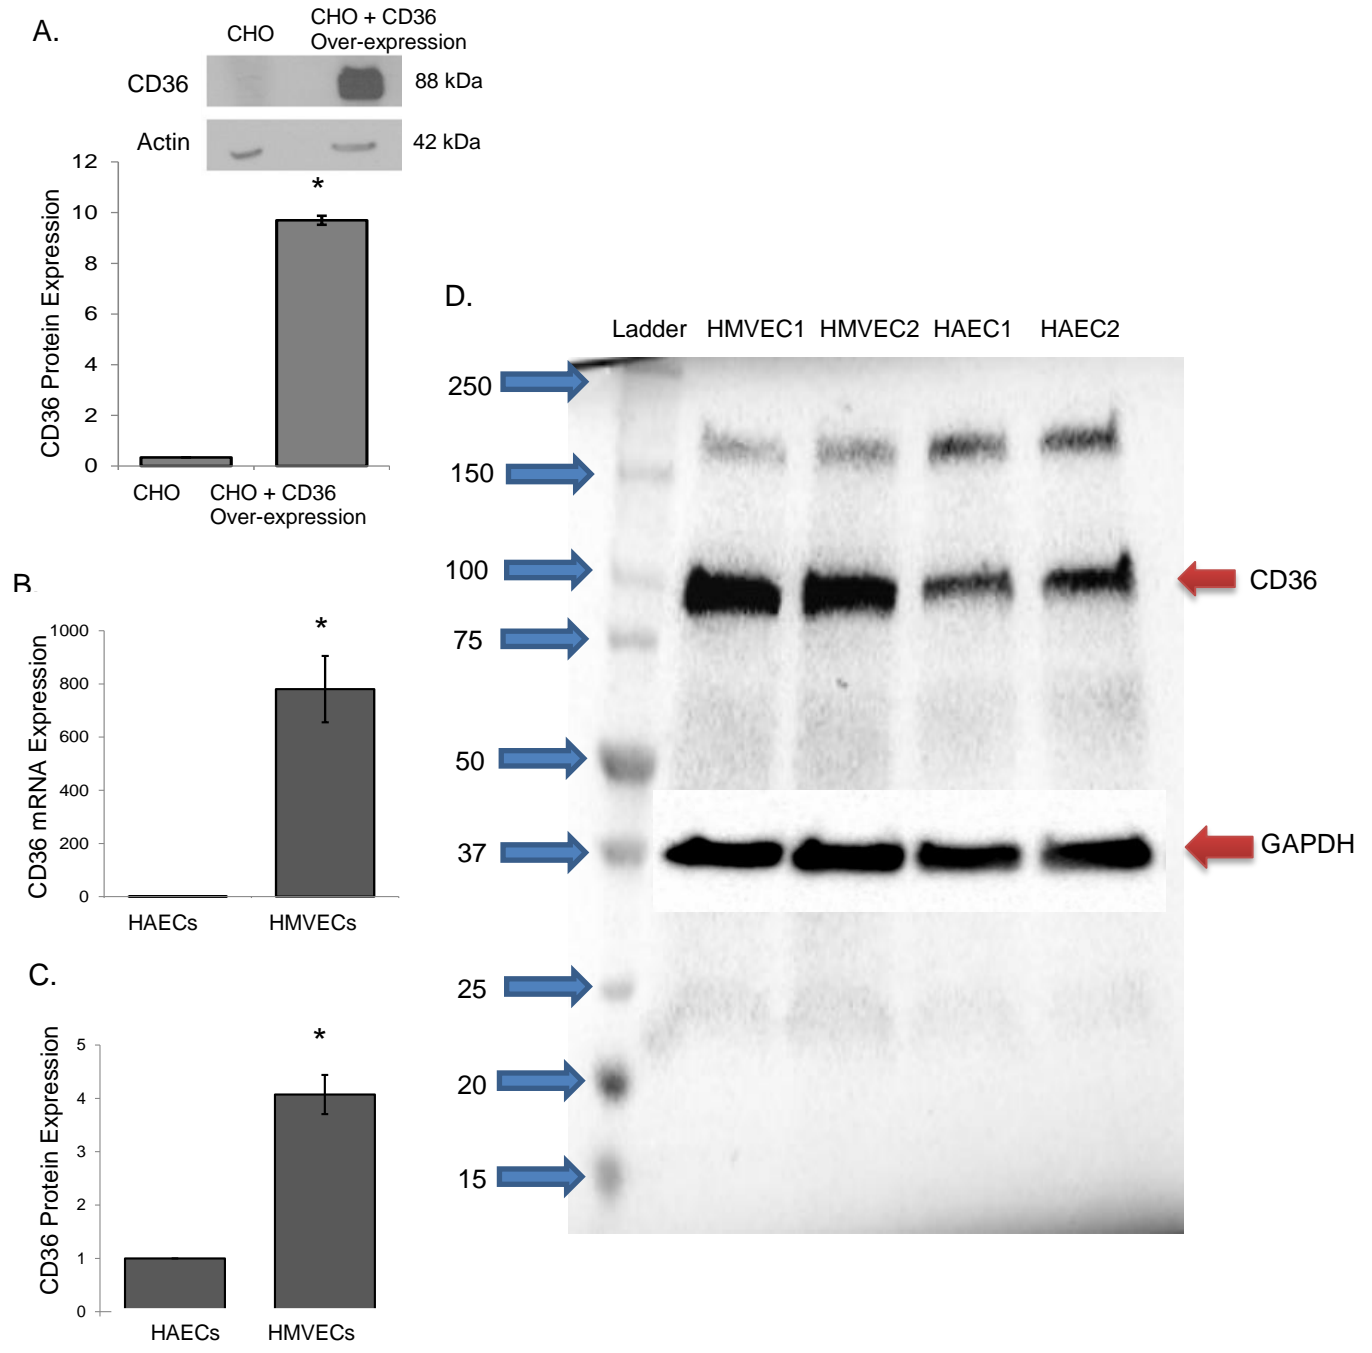

**Supplemental Figure V:** **A:** Representative western blot and average CD36 protein expression in CHO cells that do not express detectable amount of CD36 and CHO cells over-expressed with human CD36 construct (n=4). **B, C and D:** Average CD36 mRNA (n=3) (**B**) and protein expression (n=4) (**C**) in HAECs compared to HMVECs with representative full western blot gel with markers (**D**). \*p<0.05

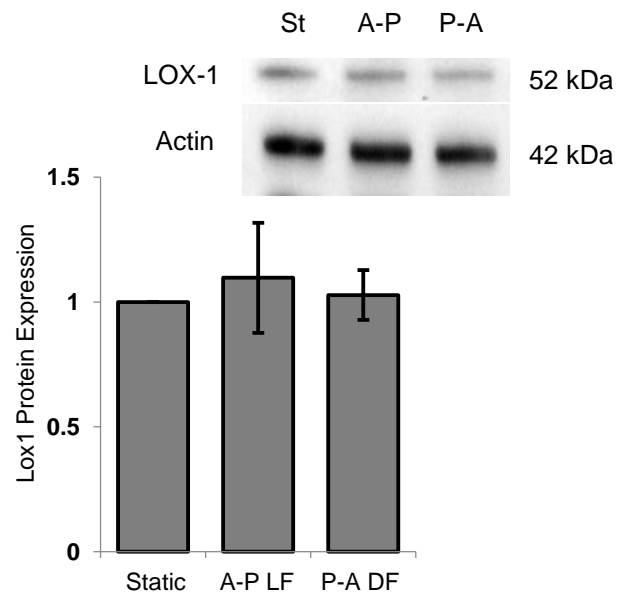

**Supplemental Figure VI:** Lox1 protein expression in HAECs exposed to 48 hours of athero-protective and pro-atherogenic flow as well as static conditions (n=5).

A.

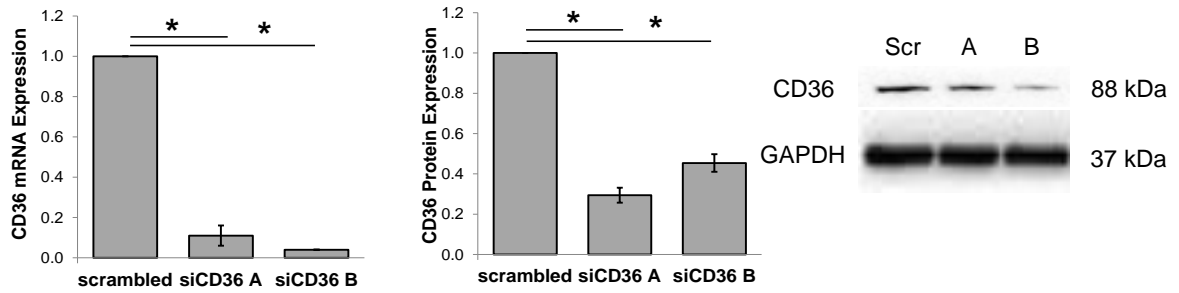

B.

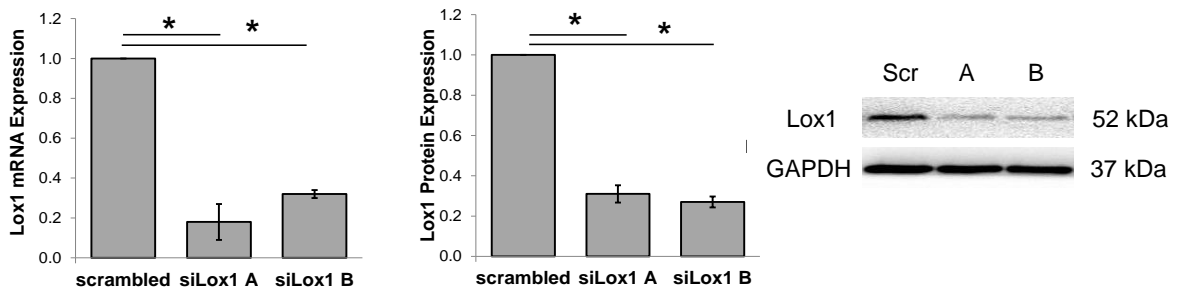

**Supplemental Figure VII: A:** CD36 mRNA expression (left) and CD36 protein expression (middle, right) for scrambled and two different CD36-targeting siRNAs. **B:** Lox1 mRNA expression (left) and Lox1 protein expression (middle, right) for scrambled and two different Lox1-targeting siRNAs. \*  $p < 0.05$ .

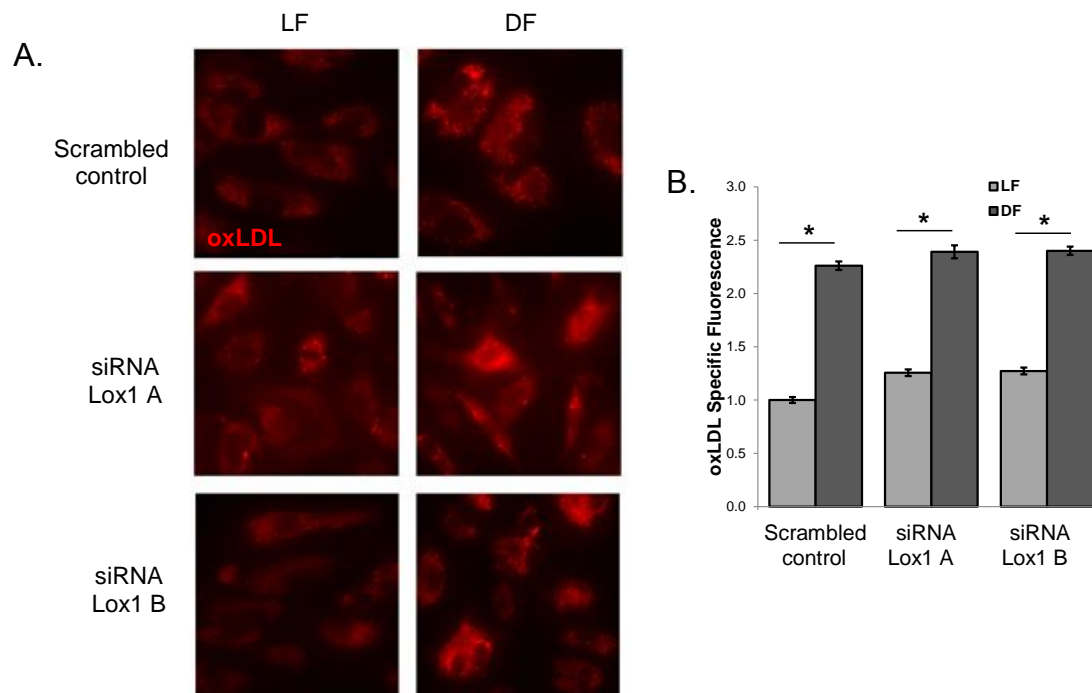

**Supplemental Figure VIII: A:** Representative images of Dil-oxLDL uptake into HAECs transfected with control (top) or Lox1-targetting siRNAs (middle, bottom) exposed to LF (left) and DF (right). **B:** Average oxLDL uptake into HAECs transfected with scrambled control or two different Lox1-targetted siRNAs under LF and DF conditions. 20-40 cells per condition per experiment, n=4 independent experiments ( $p < 0.05$ ).



A.

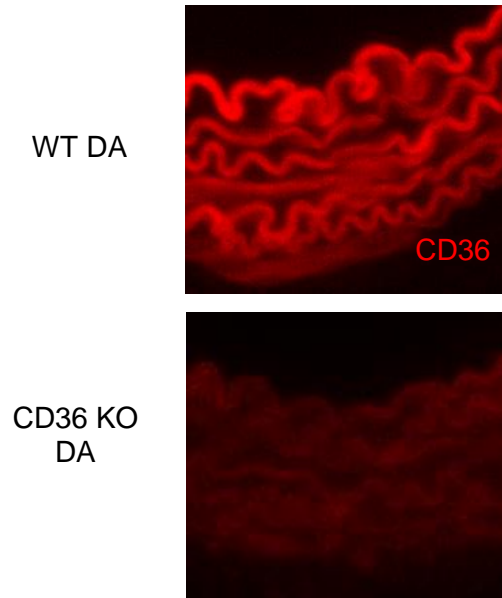

B.

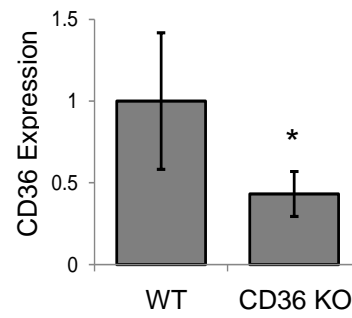

**Supplemental Figure IX: A:** Representative histology sections of descending aortic (DA) from WT (top) and CD36 KO (bottom) mice stained for CD36. **B:** Average CD36 expression in aortic sections from WT and CD36 KO mice (n=4, 15-20 sections per condition). \* p<0.05.
